# Supplementary material
Source: PubMed Central journal article supplement (PMC5278728)
Supplement: AAC.01740-16_zac002175887s1.pdf [file AAC.01740-16_zac002175887s1.pdf]

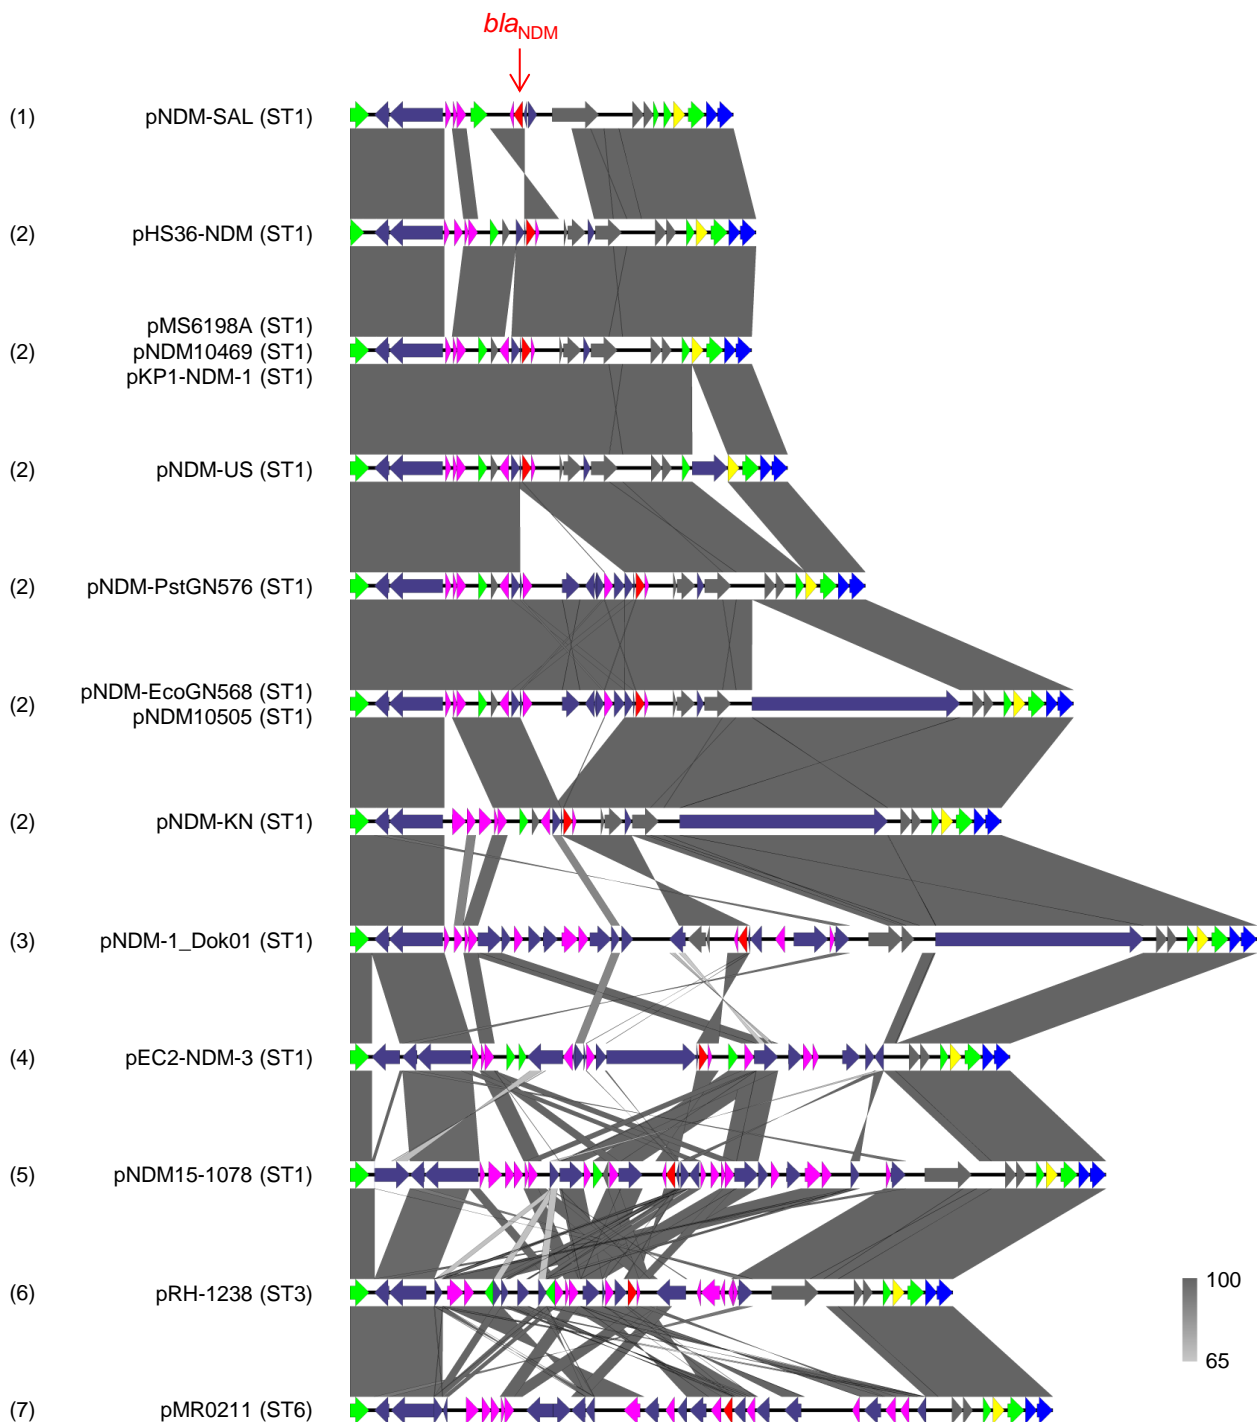

**Figure S1: Comparison of the ARI-A region in *bla*<sub>NDM</sub>-positive IncA/C plasmids.** Numbers in parentheses indicate sequences with similar *bla*<sub>NDM</sub> structures. Features are colour coded as follows: *bla*<sub>NDM</sub>, red; other resistance genes, pink; IS/transposable elements, purple; DNA binding/modification, green; conjugation, blue; plasmid stability, yellow. Plasmids KU302801.1 and KU302802.1 were omitted as the right side of ARI-A has been deleted in these plasmids.

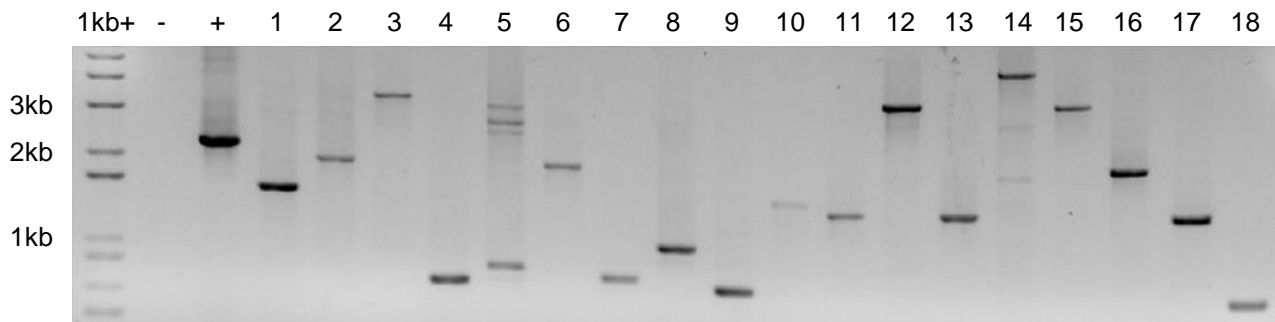

**Figure S2: Randomness of *in vitro* mutagenesis of pMS6198A.** Image of inverse PCR products from 18 individual mutants generated by *in vitro* transposon mutagenesis.

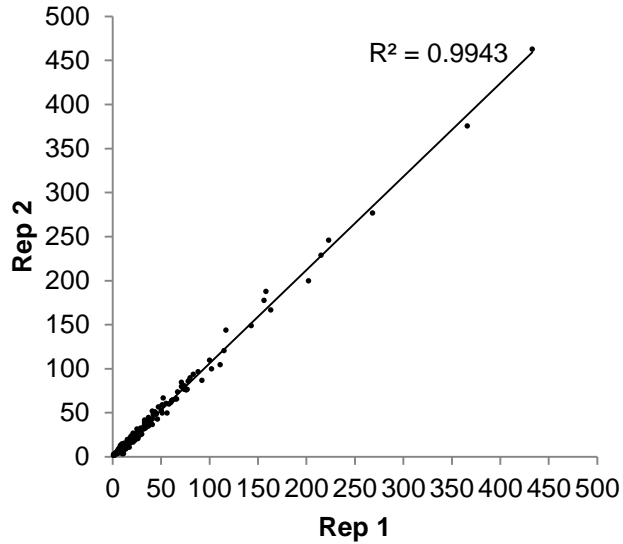

**Figure S3: *In vitro* mutagenesis and TraDIS is highly reproducible.** Correlation plot comparing the number of transposon insertion sites within each gene in replicate 1 compared to replicate 2.

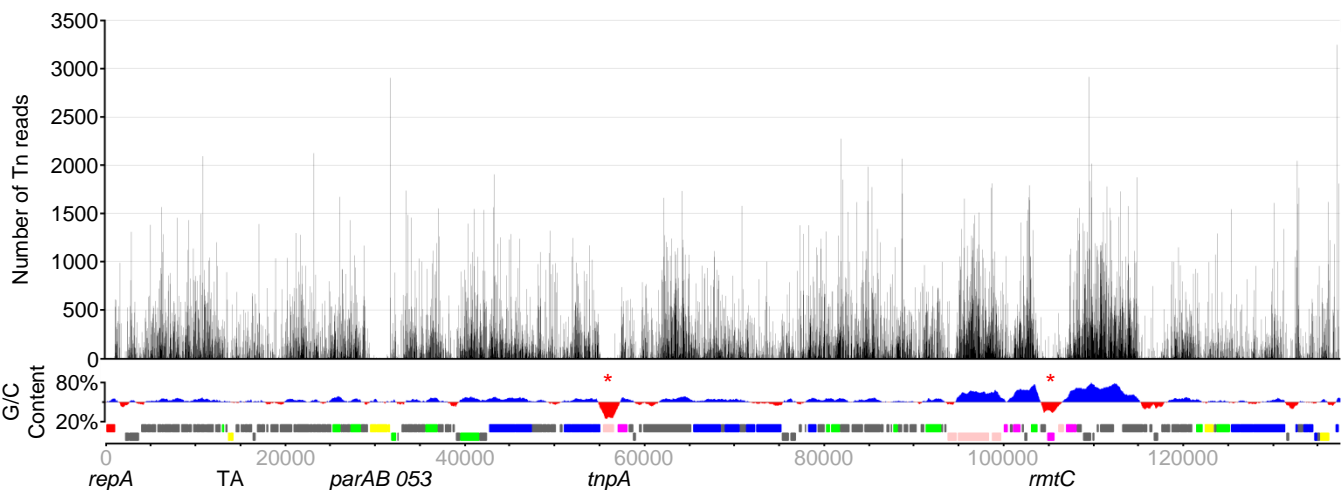

**Figure S4: Comparison of Tn5 insertion frequency and GC-content of pMS6198A.** Tracks from top to bottom are; graph of the number of transposon specific reads mapped to each base; GC-content; CDS on reverse strand; CDS on forward strand. CDS are colour coded as per Figure 1. Regions of low GC content and low insertion frequency are indicated by an asterisk; these regions correspond to the false positive TraDIS hits *tnpA* and *rmtC*.

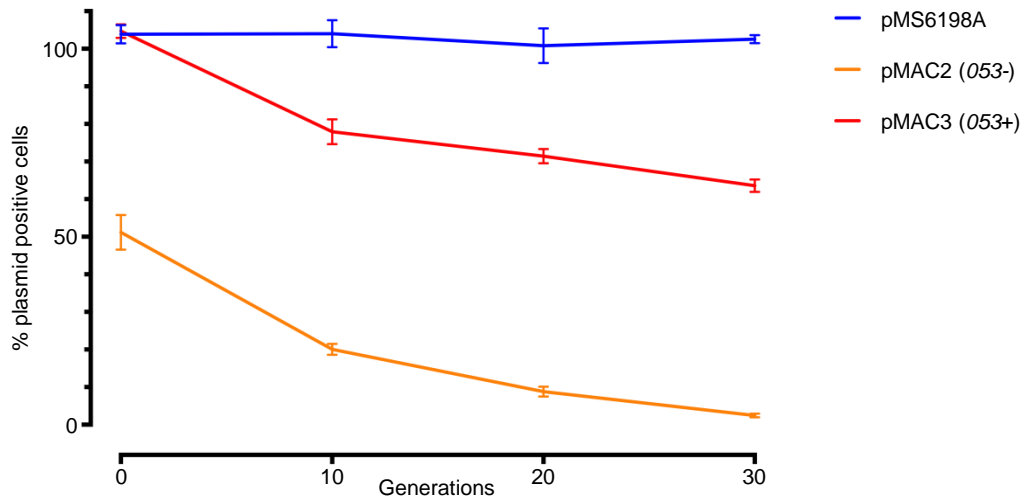

**Figure S5: Time course stability assay in broth culture of pMS6198A and miniA/C plasmids, pMAC2 and pMAC3.** The assays were performed in triplicate. Data points are mean  $\pm$  standard deviation.



A

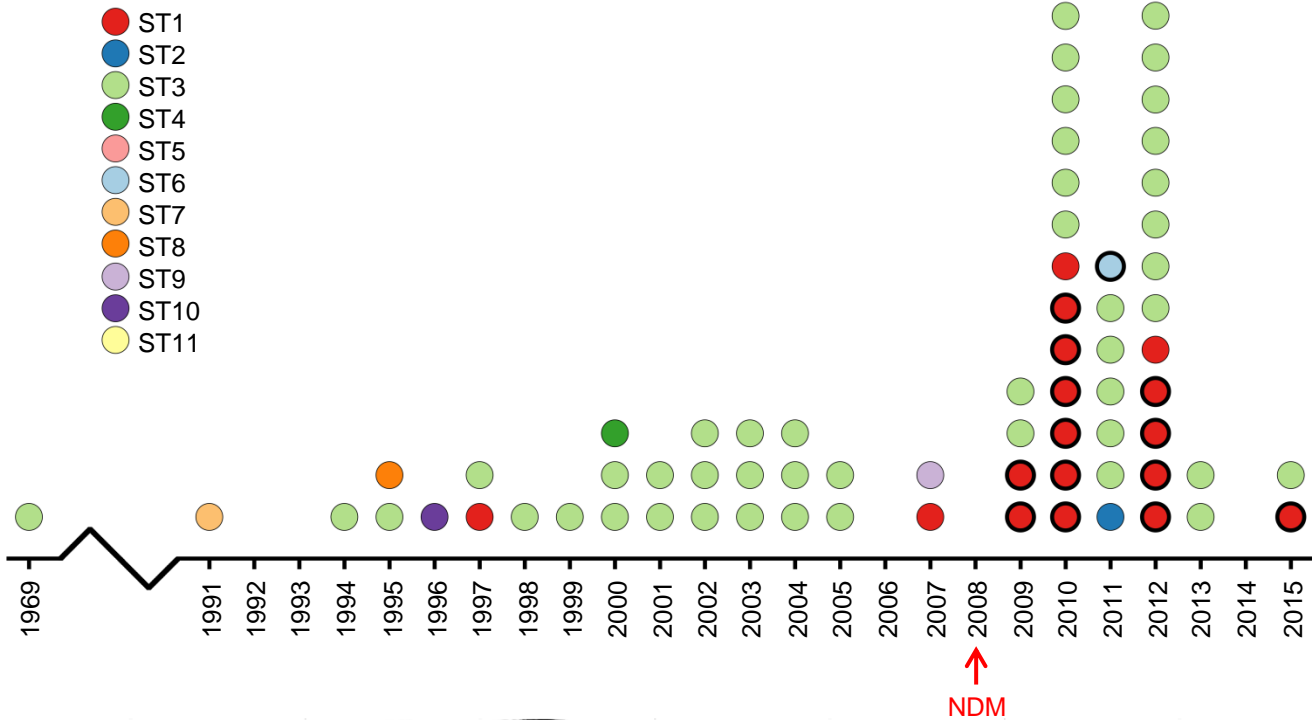

B

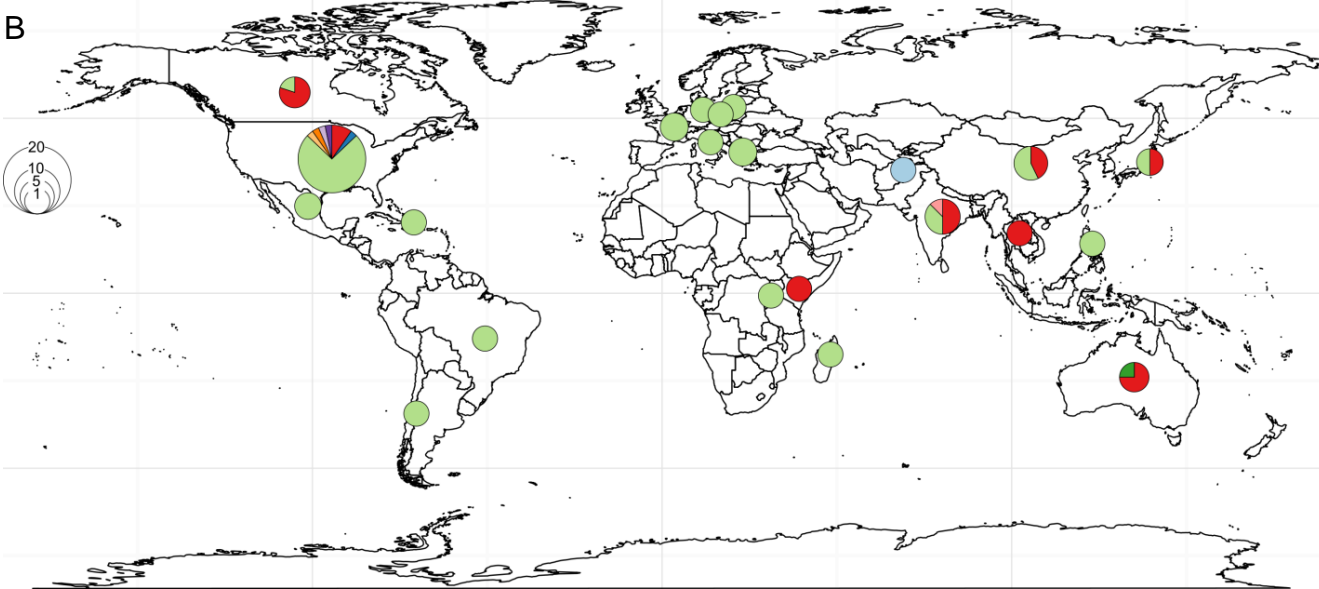

**Figure S7: Spatio-temporal distribution of fully-sequenced IncA/C plasmids from the NCBI database.** A) Temporal distribution of currently available IncA/C plasmids by sequence type. Each circle represents a single plasmid colour coded according to its ST. Circles with thick borders indicate plasmids carrying *bla*<sub>NDM</sub>; the red NDM arrow indicates the year of *bla*<sub>NDM</sub> discovery. Data based on 71/82 plasmids with isolation date. B) Global distribution of currently available IncA/C plasmids by sequence type. Pie charts show the proportion of STs while the circle size indicates the number of plasmids from each country. Data based on 78/82 IncA/C plasmids with location information.
